# Supplementary material for: Normalisation of glucose metabolism by exendin‐4 in the chronic phase after stroke promotes functional recovery in male diabetic mice
Source: PubMed Central journal article supplement — Br J Pharmacol. 2021 Jun 16;179(4):677–94. doi: 10.1111/bph.15524 (PMC8820185; doi:10.1111/bph.15524), 2021-06-16
Supplement: BPH-179-677-s001.pdf [file BPH-179-677-s001.pdf]

## Supporting Information

Figure S1

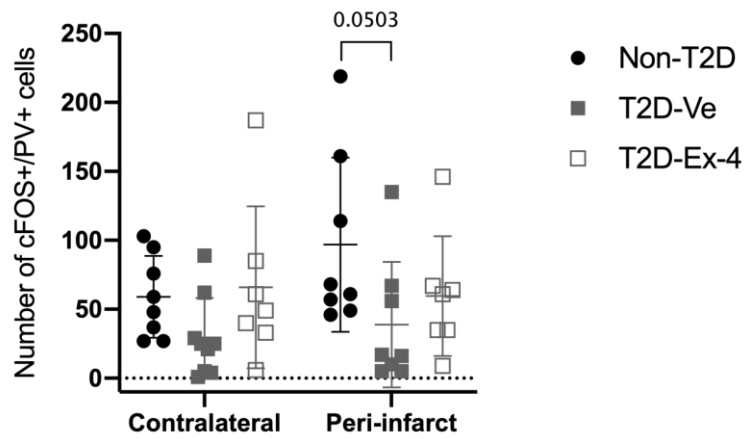

**Figure S1.** Activation of PV+ cells. Quantification of cFOS+/PV+ cells at 8 weeks after stroke in the contralateral vs. peri-infarct in the ipsilateral striatum showed no stroke effect or any difference between the groups except a trend towards decreased activation of PV+ cells in the T2D-Ve group compared to the non-T2D group. Data presented as mean±SD. Two-way ANOVA followed by Two-stage linear step-up procedure of Benjamini, Krieger and Yekutieli was used to compare the number of cFOS+/PV+ cells between non-T2D vs. T2D-Ve vs. T2D-Ex-4.

**Figure S2**

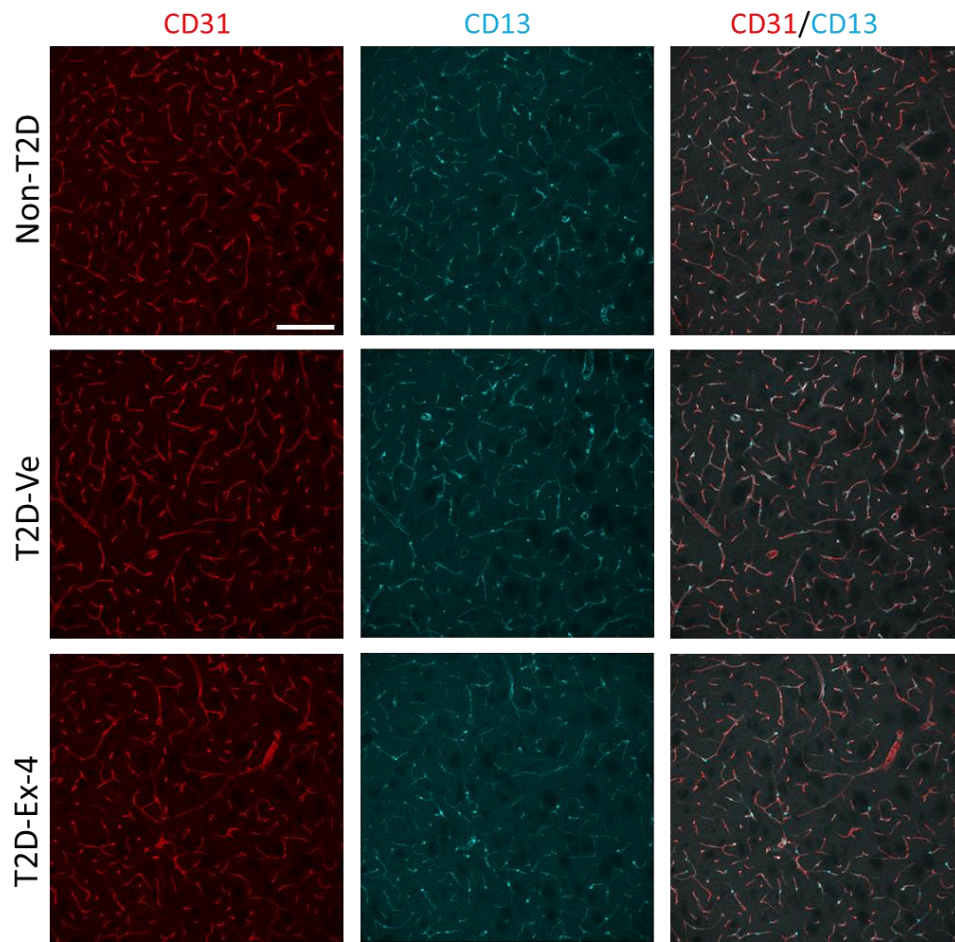

**Figure S2.** Representative images of CD31+ (vessels) and CD13+ (pericytes) staining in the contralateral striatum. Scale bar: 150  $\mu$ m.

**Figure S3**

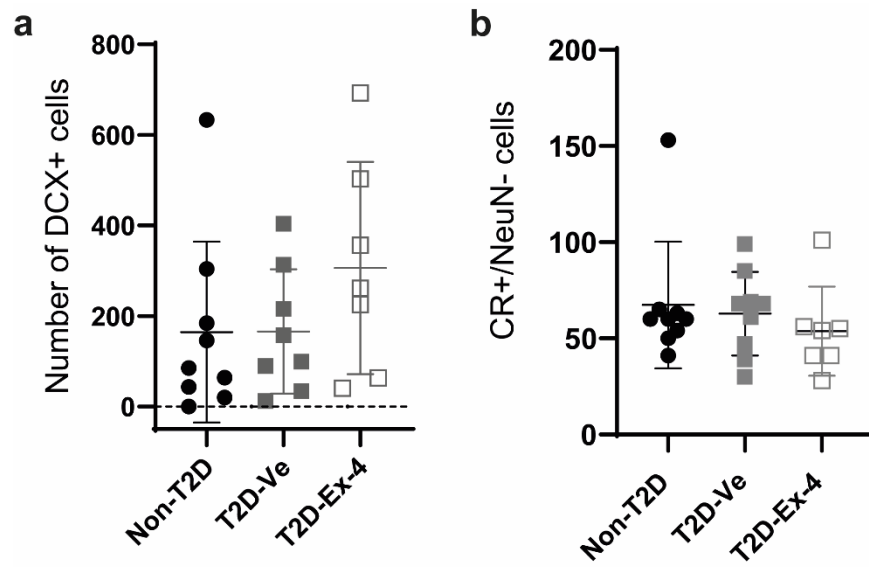

**Figure S3.** Neurogenesis. Quantification of DCX+ (a) and CR+/NeuN- (b) cells 8 weeks after stroke in the ipsilateral striatum showed no difference between the groups. Data presented as mean $\pm$ SD. Brown-Forsythe and Welch ANOVA was used to compare the number of DCX+ cells and the number of CR+/NeuN- cells between non-T2D vs. T2D-Ve vs. T2D-Ex4.
